# Supplementary material for: Structural characteristics and immunostimulatory activities of a new polysaccharide from Dendrobium fimbriatum Hook
Source: Royal Society of Chemistry journal article supplement (doi:10.1039/d0fo03336g), 2021-01-01
Supplement: d0fo03336g1.pdf [file d0fo03336g1.pdf]

## Supplementary information

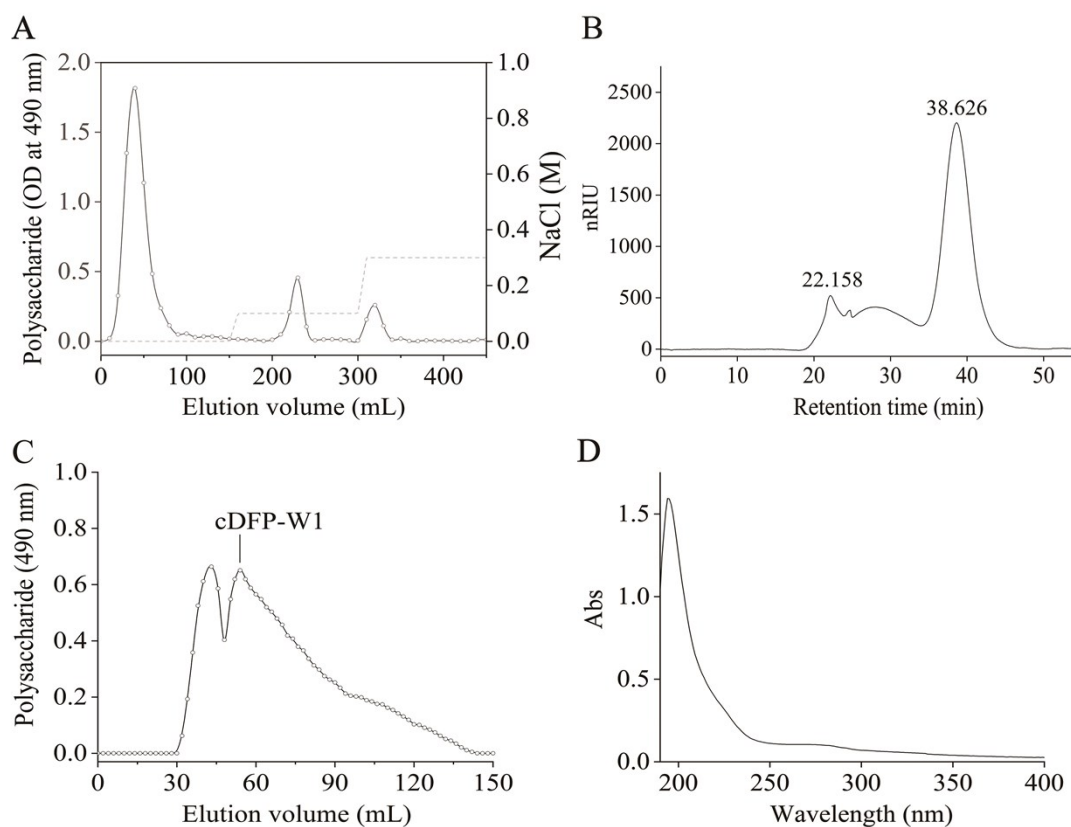

Supplementary Figure 1

Elution curve of cDFP on DE-52 cellulose anion exchange column (A), HPGPC spectrum of cDFP-W (B), Elution curve of cDFP-W on Sephadex G-75 column (C), UV spectrum of cDFP-W1 (D).

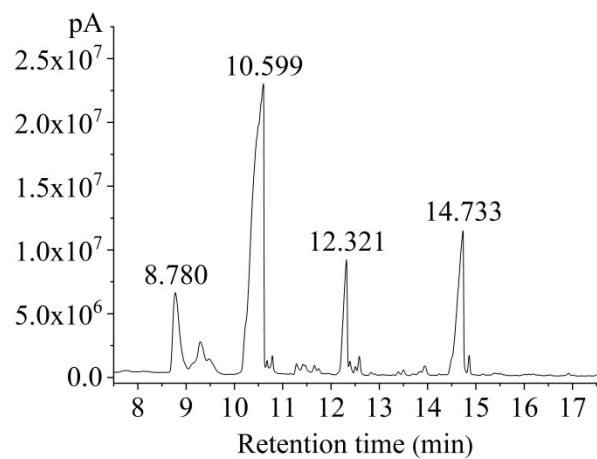

Supplementary Figure 2

The total ion current profile of methylation analysis of cDFP-W1.

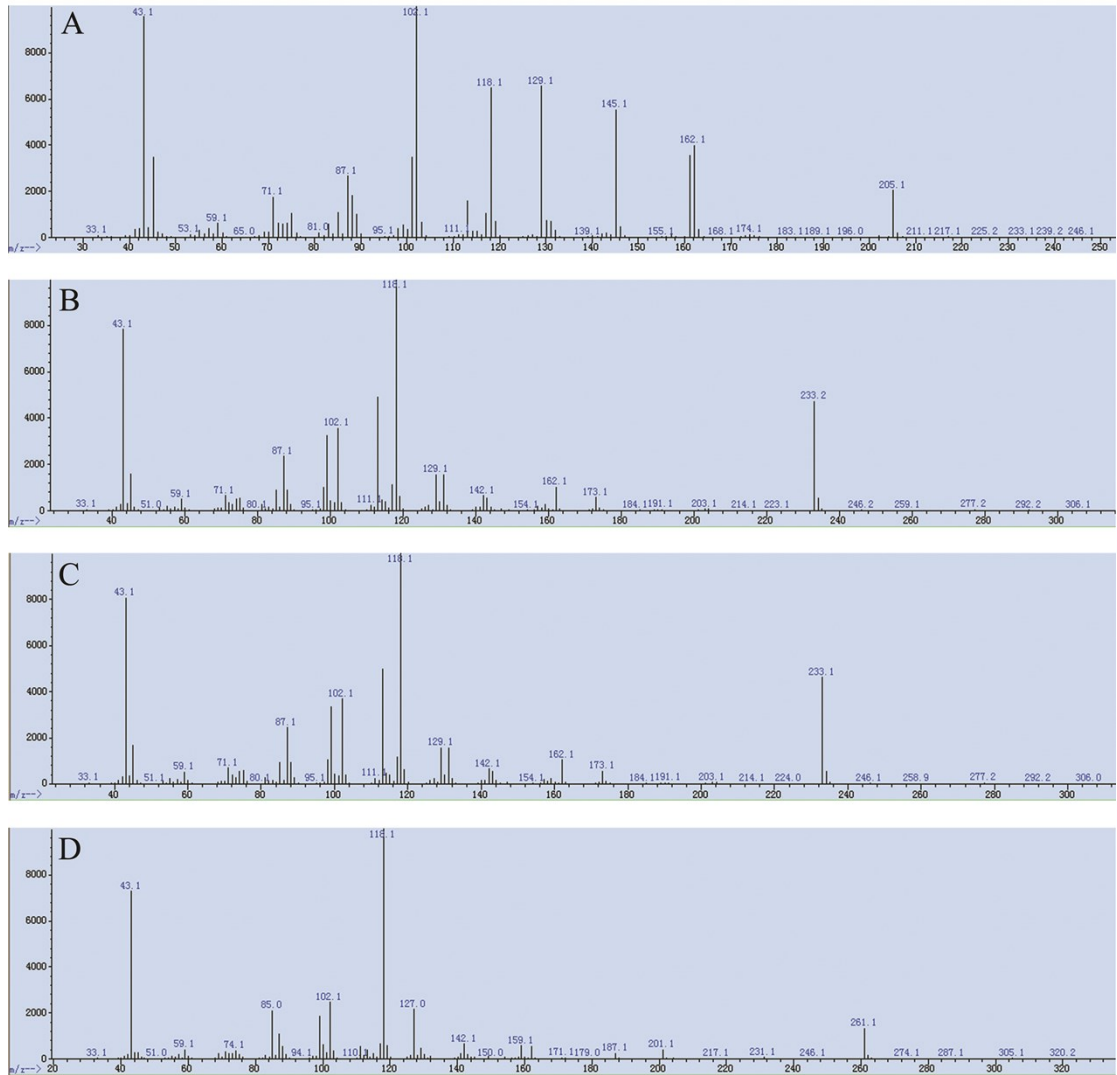

Supplementary Figure 3

A. Mass fragment of 8.780 min (2,3,4,6-Me<sub>4</sub>-Manp); B. Mass fragment of 10.599 min (2,3,6-Me<sub>3</sub>-Glc<sub>p</sub>); C. Mass fragment of 12.321 min (2,3,6-Me<sub>3</sub>-Manp); D. Mass fragment of 14.733 min (2,3-Me<sub>2</sub>-Glc<sub>p</sub>).

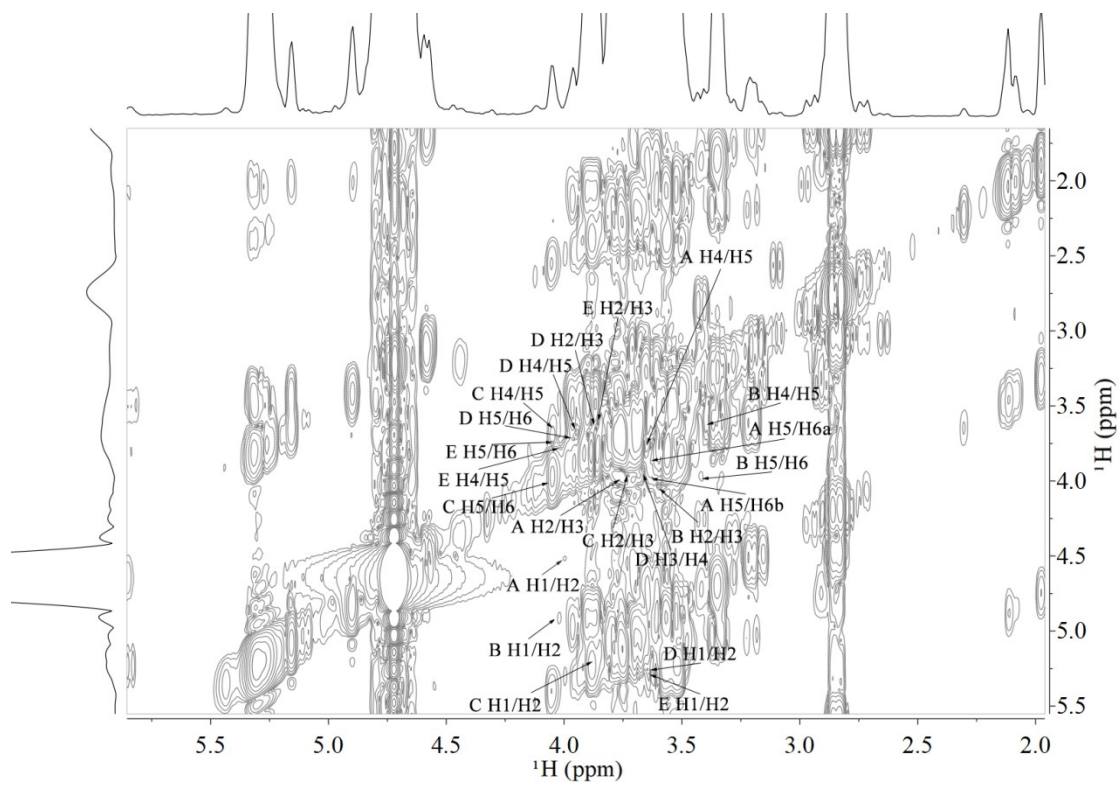

Supplementary Figure 4

The COSY spectrum of cDFP-W1.

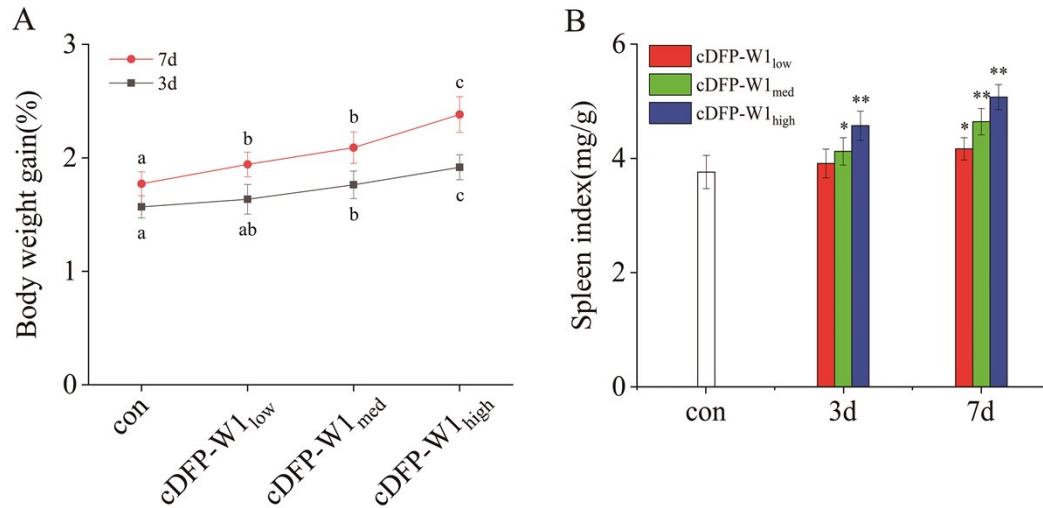

Supplementary Figure 5

Effects of oral administration period and doses of cDFP-W1 on body weight change

(A) and spleen index (B) in mice. In A, the means with different lowercases are significantly different ( $p < 0.05$ ). In B,  $*p < 0.05$  and  $**p < 0.01$  versus control group.

Body weight gain (%) =  $[(\text{body weight of day 3 or 7} - \text{body weight of day 0}) / \text{body weight of day 0}] \times 100$ . Index (mg/g) = organ weight / body weight.
